# Supplementary material for: Measurement report: Underestimated reactive organic gases from residential combustion: insights from a near-complete speciation
Source: Copernicus journal article supplement (doi:10.5194/acp-2022-711), 2022-11-02
Supplement: Supplementary file 1 [file acp-2022-711-supplement.pdf]

## Supplementary Information

### Measurement report: Underestimated reactive organic gases from residential combustion: insights from a near-complete speciation

Yaqin Gao<sup>1</sup>, Hongli Wang<sup>1\*</sup>, Lingling Yuan<sup>1</sup>, Shengao Jing<sup>1</sup>, Bin Yuan<sup>2</sup>, Guofeng Shen<sup>3</sup>, Liang Zhu<sup>4,5</sup>, Abigail Koss<sup>5</sup>, Yingjie Li<sup>1</sup>, Qian Wang<sup>1</sup>, Dan Dan Huang<sup>1</sup>, Shuhui Zhu<sup>1</sup>, Shikang Tao<sup>1</sup>, Shengrong Lou<sup>1</sup>, Cheng Huang<sup>1\*</sup>

<sup>1</sup> State Environmental Protection Key Laboratory of Formation and Prevention of Urban Air Pollution Complex, Shanghai Academy of Environmental Sciences, Shanghai 200233, China

<sup>2</sup> Institute for Environmental and Climate Research, Jinan University, Guangzhou 511443, China

<sup>3</sup> Laboratory of Earth Surface Processes, College of Urban and Environmental Science, Peking University, Beijing 100871, China

<sup>4</sup> Tofwerk China, Nanjing 210000, China

<sup>5</sup> Tofwerk AG, Thun 3645, Switzerland

\* Corresponding author: Hongli Wang, E-mail: [wanghl@saes.sh.cn](mailto:wanghl@saes.sh.cn); Cheng Huang, E-mail: [Huangc@saes.sh.cn](mailto:Huangc@saes.sh.cn)

**8 figures**

**5 tables**

**22 pages**

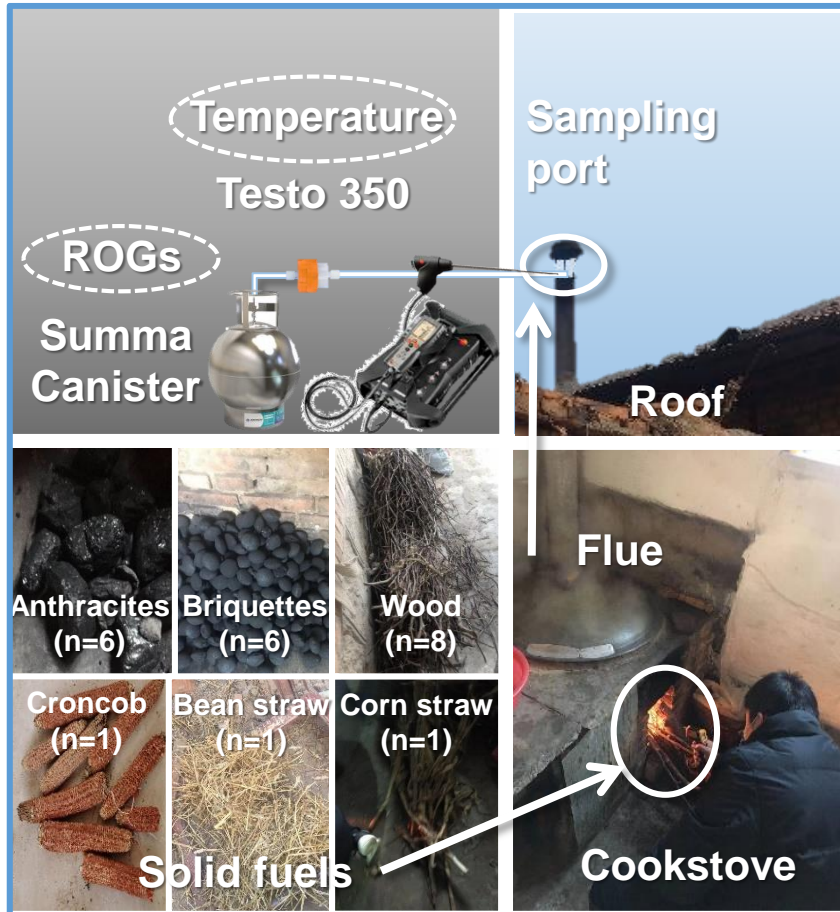

**Figure S1.** Sampling diagram relates to six solid fuels types, household stoves, sampling port and equipment. n refers to the number of different samples.

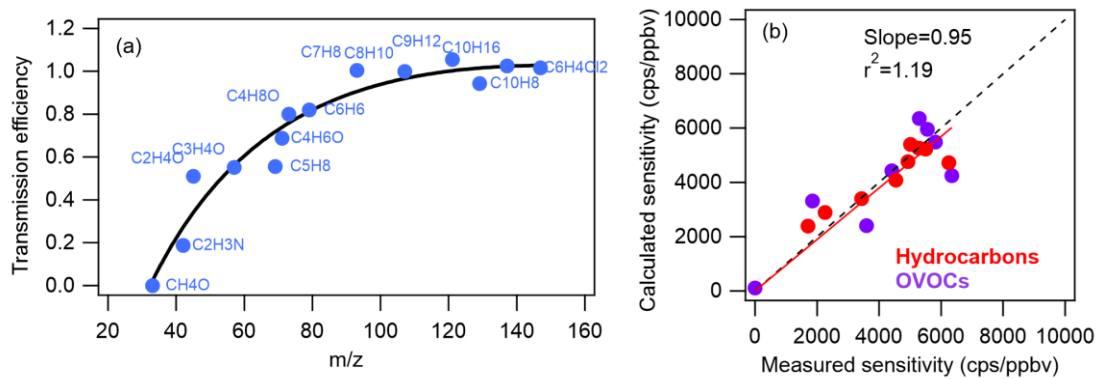

**Figure S2.** (a) The transmission efficiency of the Vocus PTR-ToF-MS and (b) comparison of measured and calculated calibration factors for several ROGs. The black dash line means 1:1.

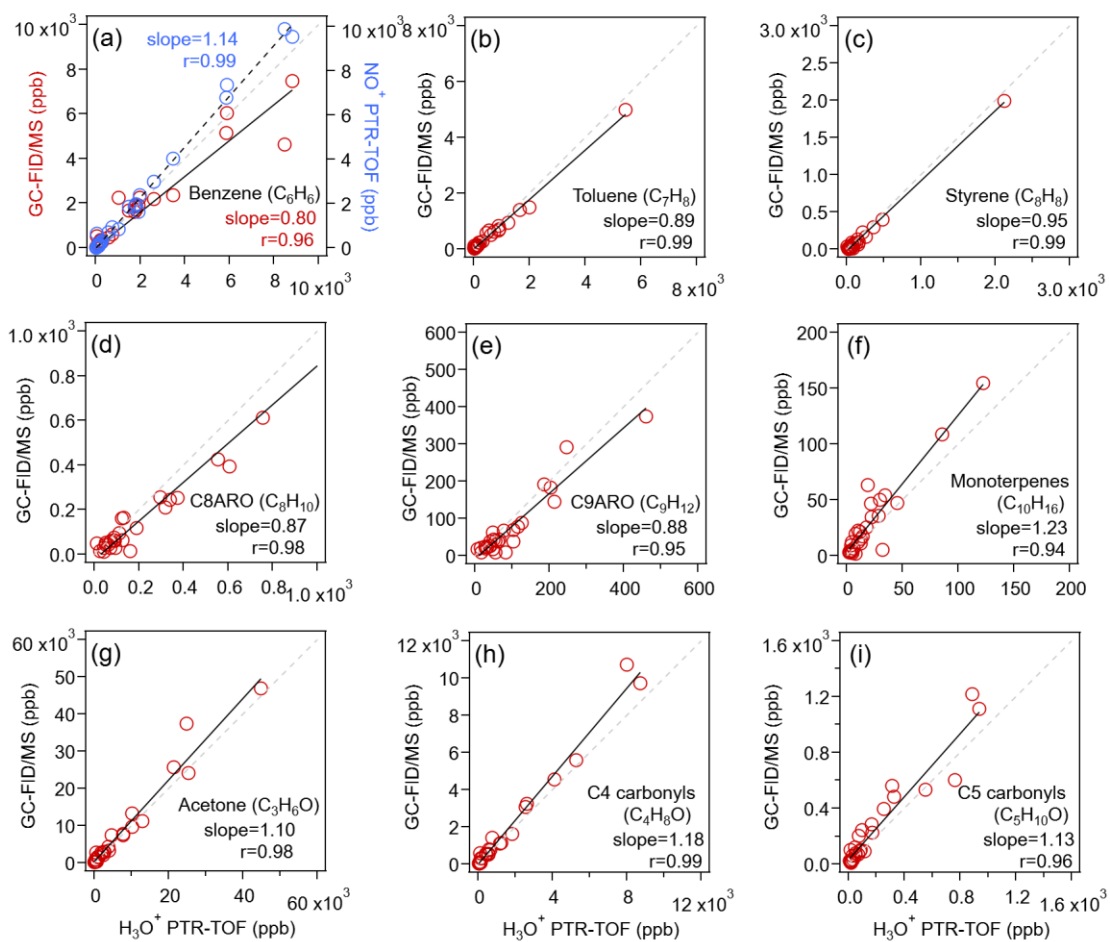

**Figure S3.** Intercomparisons between species measurement of samples by GC-FID/MS and by  $H_3O^+/NO^+$  Vocus PTR-ToF-MS. C8ARO and C9ARO refer to aromatics containing 8 carbon and 9 carbon atoms, respectively.

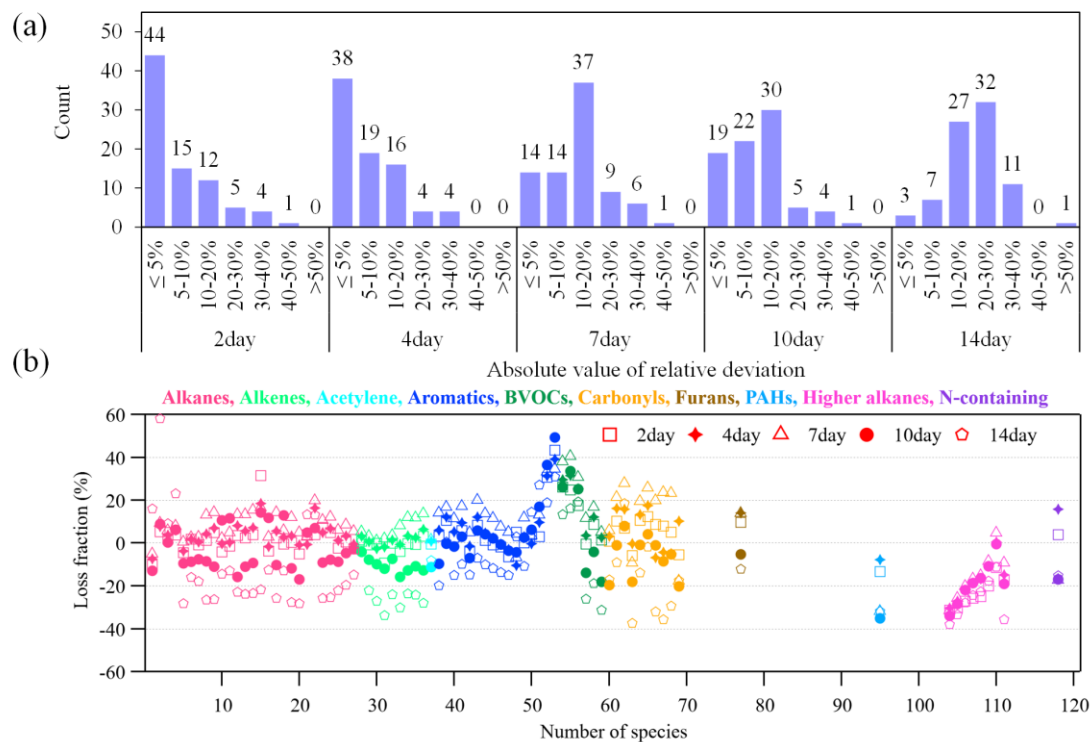

**Figure S4.** Statistical evaluation on the loss fraction of ROGs in the canisters. (a) Species counts in different loss fraction bins on 2, 4, 7, 10, 14 days (x-axis) of storage in the canisters. (b) The loss fraction of each compound standards on 2, 4, 7, 10, 14 days of storage in the canisters. The measured species corresponding to the numbers of horizontal axis are listed in Table S1.

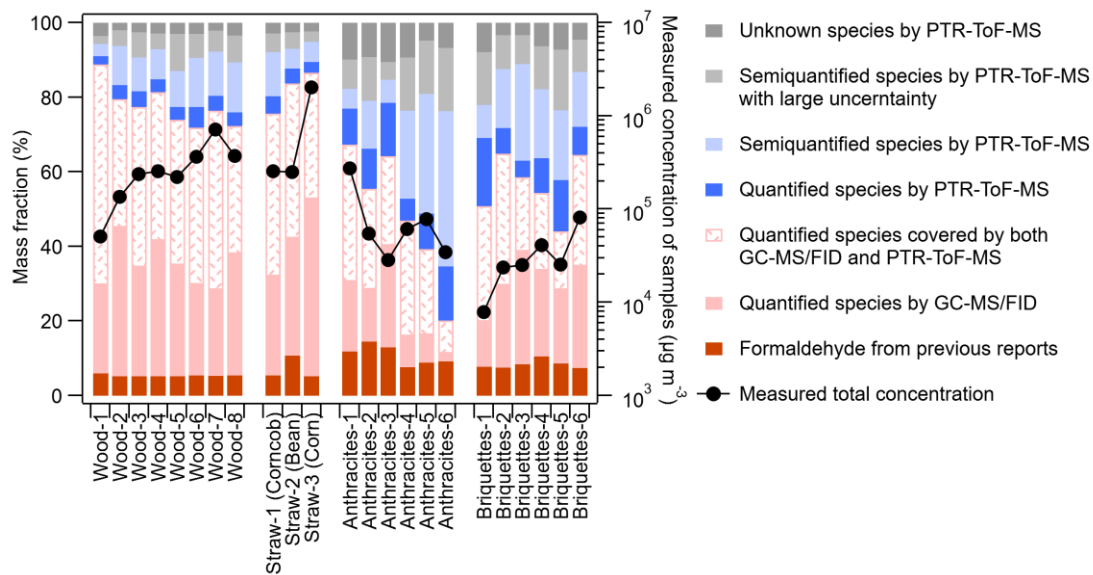

**Figure S5.** Profile composition of species for different samples measured by GC-MS/FID and Vocus PTR-ToF-MS and the measured total ROG concentration of each sample (black line).

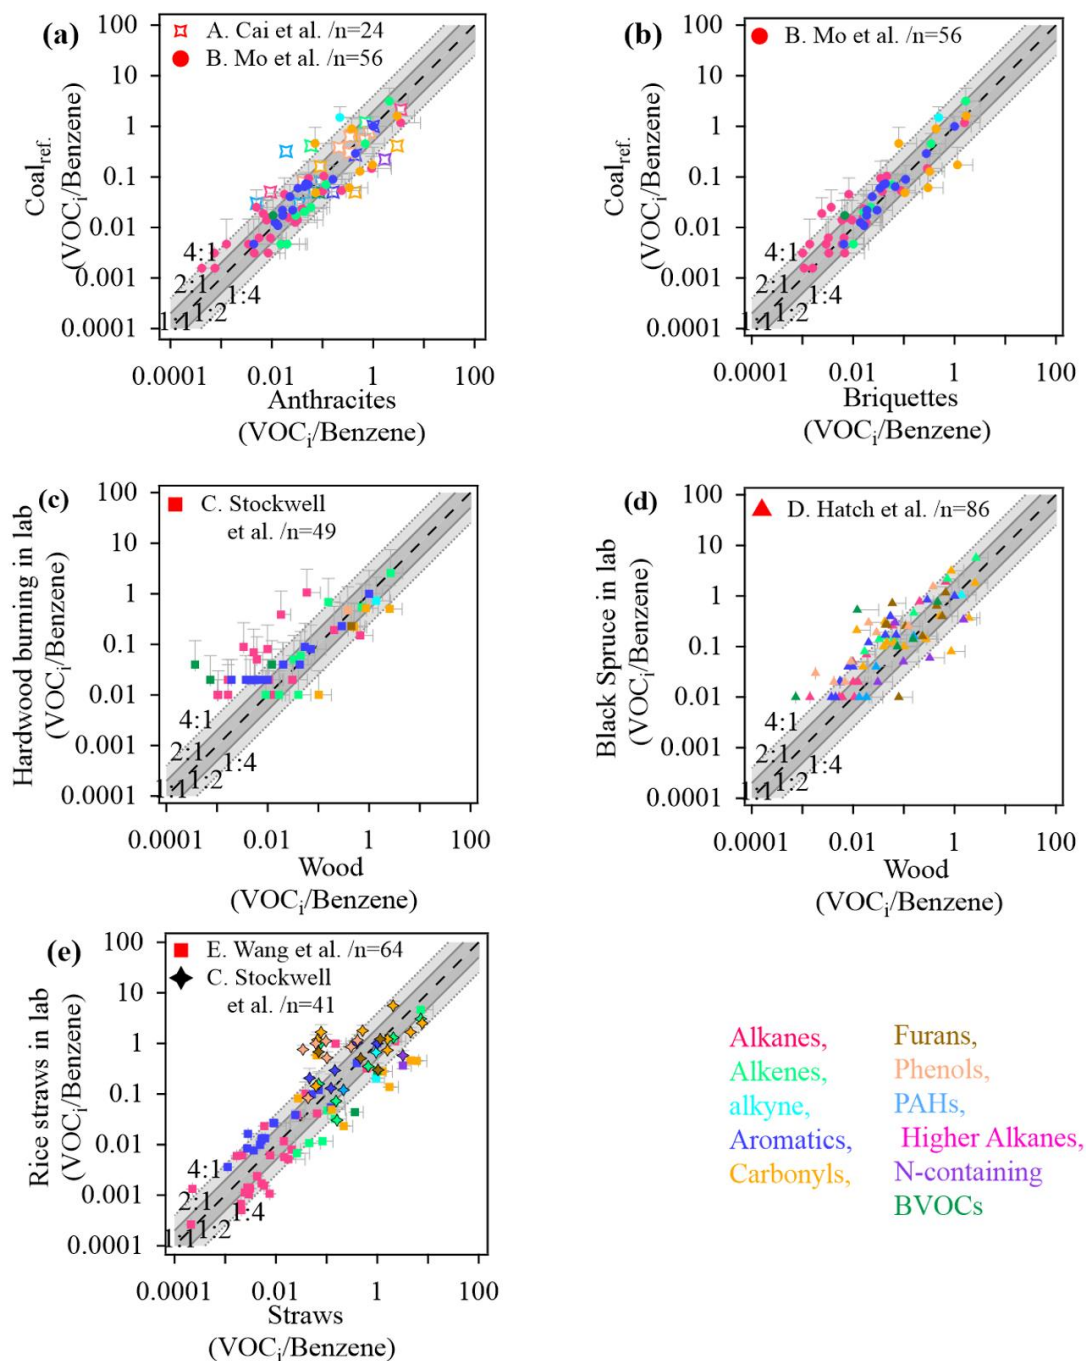

**Figure S6.** Comparison of emission ratios between this study and the previous studies (Hatch et al., 2017; Mo et al., 2016; Stockwell et al., 2015; Wang et al., 2014; Cai et al., 2019; Stockwell et al., 2016). The black dashed lines indicate the 1:1 relationship, and the gray and light gray areas show agreements within a factor of 2 and 4, respectively. n is the number of compared species with the corresponding reference.

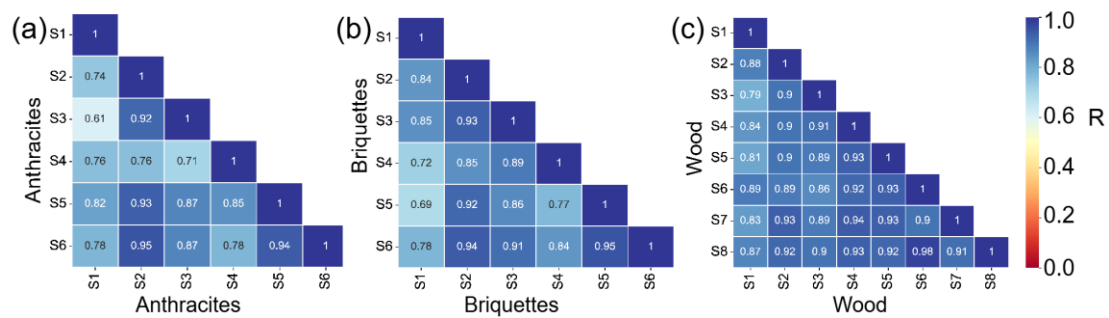

**Figure S7.** Correlation between ROG source profile of different samples of the same fuel. The number represents the Spearman correlation coefficient (R).



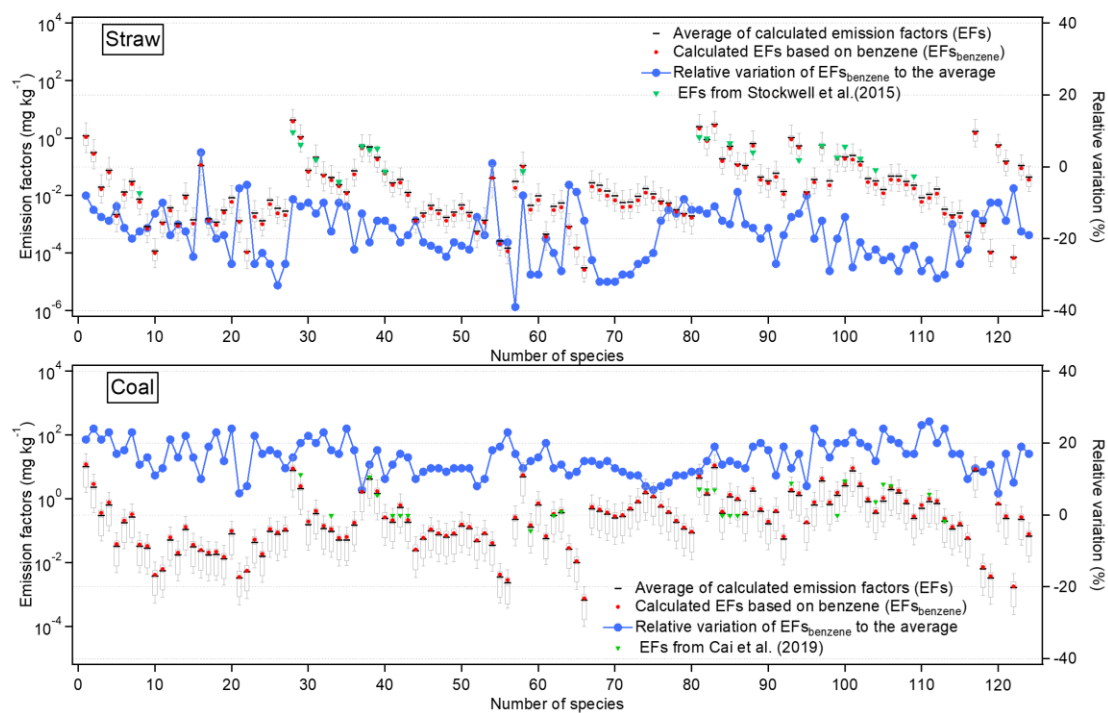

**Figure S8.** Box plot of estimated emission factors (EFs) of newly identified ROGs based on reported EF of ROGs and the relative variation (blue line) of EFs based on benzene to the average of all tests. The red dot is the calculated EFs based on benzene. The box range is the calculated EFs based on other reported species. The green dot is the EFs from references(Cai et al., 2019; Stockwell et al., 2015) used in calculation.

**Table S1** Literature review on residential combustion emissions.

| Method                       | Fuel types                                                                                        | Reference                | Numbers of species by GC-MS(/FID) | Numbers of species by Vocus PTR-ToF-MS         | Numbers of species (Other instruments) |
|------------------------------|---------------------------------------------------------------------------------------------------|--------------------------|-----------------------------------|------------------------------------------------|----------------------------------------|
|                              |                                                                                                   |                          |                                   | 84                                             |                                        |
| Combustion in stove          | Residential coals, biomass                                                                        | This study               | 71                                | (84-92% of the overall peak mass)              | —                                      |
|                              | Anthracite, bituminous coal                                                                       | (Cai et al., 2019)       | —                                 | 79-89 (90-96% of the overall peak intensities) | —                                      |
|                              | Corncob                                                                                           | (Wu et al., 2022)        | —                                 | 13                                             | —                                      |
| Combustion simulation in Lab | western US biomass fuels                                                                          | (Akherati et al., 2020)  | —                                 | 150                                            | —                                      |
|                              | burned fuels characteristic of the western U.S.                                                   | (Koss et al., 2018)      | —                                 | 172 (~95% of the overall peak intensities)     | —                                      |
|                              | four burns: ponderosa pine boughs, , Chinese rice straw, Indonesian peat, and black spruce boughs | (Hatch et al., 2017)     | ~27                               | ~71                                            | ~13 (FTIR)<br>~418 (GC×GC)             |
|                              | Authentic globally significant fuels                                                              | (Stockwell et al., 2015) | —                                 | 46-92                                          | —                                      |
|                              | laboratory biomass burns of 18 fuel types from 3 geographic regions in the US                     | (Gilman et al., 2015)    | 187                               | Unpublished                                    | Unpublished (OP-FTIR)                  |
|                              | Residential coal, rice, maize, and wheat straw                                                    | (Mo et al., 2016)        | 62                                | —                                              | 13 (DNPH-HPLC)                         |
|                              | biomass, residential coal                                                                         | (Liu et al., 2008)       | 92                                | —                                              | —                                      |

OP-FTIR: open-path Fourier transform infrared spectroscopy

DNPH-HPLC: 2, 4-Dinitrophenyl hydrazine followed by high performance liquid chromatography (HPLC)

**Table S2.** Measurement method, loss fraction in canisters, method detection limit (MDL) and uncertainty for individual species in this study.

| Number                        | Formula                         | Name (recommended species for Vocus PTR-ToF-MS) | GC-MS /FID <sup>a</sup> | Vocus PTR-ToF-MS <sup>b</sup> | Loss ratio on day 10th <sup>d</sup> (avg. ± sd., %) | MDL (ppt) | Uncertainty (%) |
|-------------------------------|---------------------------------|-------------------------------------------------|-------------------------|-------------------------------|-----------------------------------------------------|-----------|-----------------|
| <b>Alkanes (27)</b>           |                                 |                                                 |                         |                               |                                                     |           |                 |
| 1                             | C <sub>2</sub> H <sub>6</sub>   | Ethane                                          | Yes                     | No                            | -12.9 ± 3.4                                         | 54.3      | 14              |
| 2                             | C <sub>3</sub> H <sub>8</sub>   | Propane                                         | Yes                     | No                            | 8.9 ± 13.8                                          | 45.9      | 10              |
| 3                             | C <sub>4</sub> H <sub>10</sub>  | Isobutane                                       | Yes                     | No                            | 0.3 ± 3.8                                           | 54.3      | 4               |
| 4                             | C <sub>4</sub> H <sub>10</sub>  | n-Butane                                        | Yes                     | No                            | 6.2 ± 10.3                                          | 56.1      | 8               |
| 5                             | C <sub>5</sub> H <sub>10</sub>  | Cyclopentane                                    | Yes                     | No                            | -9.5 ± 7.3                                          | 63.4      | 10              |
| 6                             | C <sub>5</sub> H <sub>12</sub>  | Isopentane                                      | Yes                     | No                            | -8.7 ± 6.7                                          | 55.5      | 9               |
| 7                             | C <sub>5</sub> H <sub>12</sub>  | n-Pentane                                       | Yes                     | No                            | -7.6 ± 5.4                                          | 67.5      | 8               |
| 8                             | C <sub>6</sub> H <sub>12</sub>  | Methylcyclopentane                              | Yes                     | No                            | -8.6 ± 10.9                                         | 46.0      | 10              |
| 9                             | C <sub>6</sub> H <sub>12</sub>  | Cyclohexane                                     | Yes                     | No                            | -11.0 ± 11.3                                        | 36.4      | 12              |
| 10                            | C <sub>6</sub> H <sub>14</sub>  | 2,2-Dimethylbutane                              | Yes                     | No                            | -14.4 ± 8.2                                         | 36.7      | 15              |
| 11                            | C <sub>6</sub> H <sub>14</sub>  | 2,3-Dimethylbutane                              | Yes                     | No                            | -13.0 ± 9.6                                         | 46.7      | 16              |
| 12                            | C <sub>6</sub> H <sub>14</sub>  | 2-Methylpentane                                 | Yes                     | No                            | -15.8 ± 8.1                                         | 26.6      | 16              |
| 13                            | C <sub>6</sub> H <sub>14</sub>  | 3-Methylpentane                                 | Yes                     | No                            | -11.0 ± 10.2                                        | 34.6      | 11              |
| 14                            | C <sub>6</sub> H <sub>14</sub>  | n-Hexane                                        | Yes                     | No                            | -9.2 ± 10.2                                         | 36.4      | 10              |
| 15                            | C <sub>7</sub> H <sub>14</sub>  | Methylcyclohexane                               | Yes                     | No                            | 14.3 ± 14.8                                         | 33.0      | 15              |
| 16                            | C <sub>7</sub> H <sub>16</sub>  | 2,4-Dimethylpentane                             | Yes                     | No                            | -12.6 ± 10.9                                        | 36.6      | 14              |
| 17                            | C <sub>7</sub> H <sub>16</sub>  | 2-Methylhexane                                  | Yes                     | No                            | -10.2 ± 11.5                                        | 38.7      | 12              |
| 18                            | C <sub>7</sub> H <sub>16</sub>  | 2,3-Dimethylpentane                             | Yes                     | No                            | -13.0 ± 11.5                                        | 36.5      | 13              |
| 19                            | C <sub>7</sub> H <sub>16</sub>  | 3-Methylhexane                                  | Yes                     | No                            | -11.7 ± 11.8                                        | 40.8      | 14              |
| 20                            | C <sub>7</sub> H <sub>16</sub>  | n-Heptane                                       | Yes                     | No                            | -17.0 ± 9.6                                         | 9.6       | 21              |
| 21                            | C <sub>8</sub> H <sub>18</sub>  | 2,2,4-Trimethylpentane                          | Yes                     | No                            | -10.5 ± 12.0                                        | 23.8      | 11              |
| 22                            | C <sub>8</sub> H <sub>18</sub>  | 2,3,4-Trimethylpentane                          | Yes                     | No                            | -6.4 ± 12.1                                         | 6.9       | 13              |
| 23                            | C <sub>8</sub> H <sub>18</sub>  | 2-Methylheptane                                 | Yes                     | No                            | -9.1 ± 11.9                                         | 3.7       | 15              |
| 24                            | C <sub>8</sub> H <sub>18</sub>  | 3-Methylheptane                                 | Yes                     | No                            | -7.8 ± 12.2                                         | 4.0       | 15              |
| 25                            | C <sub>8</sub> H <sub>18</sub>  | n-Octane                                        | Yes                     | No                            | -8.7 ± 11.3                                         | 13.1      | 20              |
| 26                            | C <sub>9</sub> H <sub>20</sub>  | n-Nonane                                        | Yes                     | No                            | -4.7 ± 12.1                                         | 13.6      | 15              |
| 27                            | C <sub>10</sub> H <sub>22</sub> | n-Decane                                        | Yes                     | No                            | -2.8 ± 12.1                                         | 26.9      | 20              |
| <b>Alkenes (9)/Alkyne (1)</b> |                                 |                                                 |                         |                               |                                                     |           |                 |
| 28                            | C <sub>2</sub> H <sub>4</sub>   | Ethylene                                        | Yes                     | No                            | -4.1 ± 6.7                                          | 24.5      | 7               |
| 29                            | C <sub>3</sub> H <sub>6</sub>   | Propylene                                       | Yes                     | No                            | -7.7 ± 8.2                                          | 34.3      | 10              |
| 30                            | C <sub>4</sub> H <sub>8</sub>   | Trans-2-butene                                  | Yes                     | No                            | -9.8 ± 7.7                                          | 69.2      | 10              |
| 31                            | C <sub>4</sub> H <sub>8</sub>   | 1-Butene                                        | Yes                     | No                            | -11.9 ± 13.4                                        | 50.6      | 12              |
| 32                            | C <sub>4</sub> H <sub>8</sub>   | Cis-2-butene                                    | Yes                     | No                            | -7.4 ± 7.4                                          | 27.6      | 8               |
| 33                            | C <sub>5</sub> H <sub>10</sub>  | 1-Pentene                                       | Yes                     | No                            | -15.8 ± 9.6                                         | 33.3      | 16              |
| 34                            | C <sub>5</sub> H <sub>10</sub>  | Trans-2-pentene                                 | Yes                     | No                            | -12.7 ± 9.3                                         | 36.8      | 13              |
| 35                            | C <sub>5</sub> H <sub>10</sub>  | Cis-2-pentene                                   | Yes                     | No                            | -10.9 ± 13.0                                        | 37.1      | 11              |
| 36                            | C <sub>6</sub> H <sub>12</sub>  | 1-Hexene                                        | Yes                     | No                            | -12.7 ± 9.7                                         | 36.4      | 14              |
| 37                            | C <sub>2</sub> H <sub>2</sub>   | Acetylene                                       | Yes                     | No                            | -11.2 ± 6.5                                         | 83.1      | 12              |
| <b>Aromatics (16)</b>         |                                 |                                                 |                         |                               |                                                     |           |                 |
| 38                            | C <sub>6</sub> H <sub>6</sub>   | Benzene*                                        | Yes                     | Yes                           | -9.7 ± 11.8                                         | 17.6      | 11              |
| 39                            | C <sub>7</sub> H <sub>8</sub>   | Toluene*                                        | Yes                     | Yes                           | -0.3 ± 10.9                                         | 7.8       | 1               |
| 40                            | C <sub>8</sub> H <sub>8</sub>   | Styrene*                                        | Yes                     | Yes                           | -1.6 ± 12.3                                         | 45.9      | 6               |
| 41                            | C <sub>8</sub> H <sub>10</sub>  | Ethylbenzene                                    | Yes                     | Yes                           | 2.9 ± 12.7                                          | 16.3      | 9               |
| 42                            | C <sub>8</sub> H <sub>10</sub>  | m/p-Xylene*                                     | Yes                     | Yes                           | -6.9 ± 11.2                                         | 28.5      | 16              |
| 43                            | C <sub>8</sub> H <sub>10</sub>  | o-Xylene                                        | Yes                     | Yes                           | 5.8 ± 13.6                                          | 15.1      | 11              |
| 44                            | C <sub>9</sub> H <sub>12</sub>  | iso-Propylbenzene                               | Yes                     | Yes                           | 4.1 ± 13.5                                          | 16.4      | 6               |
| 45                            | C <sub>9</sub> H <sub>12</sub>  | n-Propylbenzene                                 | Yes                     | Yes                           | 2.2 ± 13.2                                          | 21.0      | 7               |
| 46                            | C <sub>9</sub> H <sub>12</sub>  | m-Ethyltoluene                                  | Yes                     | Yes                           | -0.7 ± 12.8                                         | 28.1      | 4               |

|                       |                                               |                                         |     |     |              |      |    |
|-----------------------|-----------------------------------------------|-----------------------------------------|-----|-----|--------------|------|----|
| 47                    | C <sub>9</sub> H <sub>12</sub>                | p-Ethyltoluene                          | Yes | Yes | -3.5 ± 12.3  | 47.9 | 7  |
| 48                    | C <sub>9</sub> H <sub>12</sub>                | 1,3,5-Trimethylbenzene*                 | Yes | Yes | -4.5 ± 12.0  | 30.3 | 15 |
| 49                    | C <sub>9</sub> H <sub>12</sub>                | o-Ethyltoluene                          | Yes | Yes | 2.5 ± 13.2   | 25.6 | 7  |
| 50                    | C <sub>9</sub> H <sub>12</sub>                | 1,2,4-Trimethylbenzene                  | Yes | Yes | 5.8 ± 13.6   | 61.7 | 10 |
| 51                    | C <sub>9</sub> H <sub>12</sub>                | 1,2,3-Trimethylbenzene                  | Yes | Yes | 19.8 ± 12.4  | 33.4 | 21 |
| 52                    | C <sub>10</sub> H <sub>14</sub>               | m-Diethylbenzene                        | Yes | Yes | 36.4 ± 16.1  | 42.9 | 37 |
| 53                    | C <sub>10</sub> H <sub>14</sub>               | p-Diethylbenzene                        | Yes | Yes | 49.2 ± 17.0  | 26.8 | 50 |
| <b>BVOCs (6)</b>      |                                               |                                         |     |     |              |      |    |
| 54                    | C <sub>5</sub> H <sub>8</sub>                 | Isoprene*                               | Yes | Yes | -13.8 ± 11.1 | 27.2 | 16 |
| 55                    | C <sub>10</sub> H <sub>16</sub>               | alpha-Pinene*                           | Yes | Yes | 26.2 ± 8.2   | 49.2 | 28 |
| 56                    | C <sub>10</sub> H <sub>16</sub>               | beta-Pinene                             | Yes | Yes | 33.5 ± 0.2   | 29.8 | 35 |
| 57                    | C <sub>10</sub> H <sub>16</sub>               | Cinene (Limonene)                       | Yes | Yes | 25.2 ± 2.6   | 60.9 | 30 |
| 58                    | C <sub>4</sub> H <sub>6</sub> O               | Methacrolein                            | Yes | Yes | -4.2 ± 2.6   | 28.1 | 13 |
| 59                    | C <sub>4</sub> H <sub>6</sub> O               | Methyl vinyl ketone*                    | Yes | Yes | -18.0 ± 14.6 | 20.2 | 19 |
| <b>Carbonyls (15)</b> |                                               |                                         |     |     |              |      |    |
| 60                    | C <sub>3</sub> H <sub>4</sub> O               | Acrolein*                               | Yes | Yes | -19.6 ± 5.1  | 44.1 | 20 |
| 61                    | C <sub>3</sub> H <sub>6</sub> O               | Propanal                                | Yes | Yes | -1.1 ± 6.0   | 20.2 | 4  |
| 62                    | C <sub>3</sub> H <sub>6</sub> O               | Acetone*                                | Yes | Yes | 7.9 ± 7.2    | 29.6 | 9  |
| 63                    | C <sub>4</sub> H <sub>6</sub> O               | Crotonaldehyde                          | Yes | Yes | -18.0 ± 4.0  | 32.5 | 24 |
| 64                    | C <sub>4</sub> H <sub>8</sub> O               | n-Butanal                               | Yes | Yes | -0.9 ± 2.5   | 30.2 | 5  |
| 65                    | C <sub>4</sub> H <sub>8</sub> O               | Methyl ethyl ketone*                    | Yes | Yes | 4.2 ± 1.6    | 38.7 | 5  |
| 66                    | C <sub>5</sub> H <sub>10</sub> O              | 2-Pentanone*                            | Yes | Yes | -1.0 ± 2.3   | 26.8 | 19 |
| 67                    | C <sub>5</sub> H <sub>10</sub> O              | n-Pentanal                              | Yes | Yes | -8.6 ± 4.0   | 29.7 | 10 |
| 68                    | C <sub>5</sub> H <sub>10</sub> O              | 3-Pentanone                             | Yes | Yes | -5.2 ± 3.6   | 37.1 | 6  |
| 69                    | C <sub>2</sub> H <sub>4</sub> O               | Acetaldehyde*                           | Yes | Yes | -20.1 ± 11.9 | 6.5  | 21 |
| 70                    | CH <sub>2</sub> O                             | Formaldehyde <sup>c</sup>               | —   | —   | —            | —    | —  |
| 71                    | C <sub>3</sub> H <sub>4</sub> O <sub>2</sub>  | Methylglyoxal, acrylic acid             | No  | Yes | —            | 1.5  | 12 |
| 72                    | C <sub>5</sub> H <sub>4</sub> O               | Cyclopentadienone                       | No  | Yes | —            | 0.7  | 4  |
| 73                    | C <sub>5</sub> H <sub>8</sub> O               | EVK, Dihydromethylfuran, cyclopentanone | No  | Yes | —            | 0.8  | 11 |
| 74                    | C <sub>7</sub> H <sub>6</sub> O               | Benzaldehyde                            | No  | Yes | —            | 0.3  | 16 |
| 75                    | C <sub>8</sub> H <sub>6</sub> O               | benzofuran                              | No  | Yes | —            | 0.1  | 27 |
| <b>Furans (10)</b>    |                                               |                                         |     |     |              |      |    |
| 76                    | C <sub>4</sub> H <sub>4</sub> O               | Furan*                                  | No  | Yes | -5.3 ± 2.2   | 0.9  | 10 |
| 77                    | C <sub>4</sub> H <sub>8</sub> O               | Tetrahydrofuran                         | No  | Yes | —            | 45.5 | 10 |
| 78                    | C <sub>5</sub> H <sub>6</sub> O               | Methyl furan                            | No  | Yes | —            | 0.9  | 19 |
| 79                    | C <sub>4</sub> H <sub>4</sub> O <sub>2</sub>  | Furanone                                | No  | Yes | —            | 1.1  | 27 |
| 80                    | C <sub>5</sub> H <sub>4</sub> O <sub>2</sub>  | Furfural                                | No  | Yes | —            | 0.8  | 27 |
| 81                    | C <sub>6</sub> H <sub>8</sub> O               | Dimethylfuran                           | No  | Yes | —            | 0.7  | 27 |
| 82                    | C <sub>5</sub> H <sub>6</sub> O <sub>2</sub>  | Furfuryl alcohol, PentynoicAcid         | No  | Yes | —            | 0.7  | 27 |
| 83                    | C <sub>7</sub> H <sub>10</sub> O              | TriMetfuran                             | No  | Yes | —            | 0.2  | 27 |
| 84                    | C <sub>6</sub> H <sub>8</sub> O <sub>2</sub>  | DiMetfuranone                           | No  | Yes | —            | 0.8  | 27 |
| 85                    | C <sub>8</sub> H <sub>12</sub> O              | butylfuran                              | No  | Yes | —            | 0.1  | 27 |
| <b>Phenols (9)</b>    |                                               |                                         |     |     |              |      |    |
| 86                    | C <sub>6</sub> H <sub>6</sub> O               | Phenol                                  | No  | Yes | —            | 1.1  | 20 |
| 87                    | C <sub>7</sub> H <sub>8</sub> O               | Cresols                                 | No  | Yes | —            | 0.2  | 20 |
| 88                    | C <sub>6</sub> H <sub>6</sub> O <sub>2</sub>  | Benzenediols, methylfurfural            | No  | Yes | —            | 0.9  | 29 |
| 89                    | C <sub>8</sub> H <sub>10</sub> O              | C2 phenols                              | No  | Yes | —            | 0.1  | 27 |
| 90                    | C <sub>7</sub> H <sub>8</sub> O <sub>2</sub>  | Guaiacol, methyl benzenediols           | No  | Yes | —            | 0.2  | 29 |
| 91                    | C <sub>9</sub> H <sub>12</sub> O              | Trimethylphenol                         | No  | Yes | —            | 0.1  | 27 |
| 92                    | C <sub>10</sub> H <sub>8</sub> O              | Naphthalenol                            | No  | Yes | —            | 0.0  | 19 |
| 93                    | C <sub>10</sub> H <sub>12</sub> O             | methyl chavicol                         | No  | Yes | —            | 0.0  | 27 |
| 94                    | C <sub>8</sub> H <sub>10</sub> O <sub>3</sub> | Syringol                                | No  | Yes | —            | 0.2  | 27 |
| <b>PAHs (9)</b>       |                                               |                                         |     |     |              |      |    |
| 95                    | C <sub>10</sub> H <sub>8</sub>                | naphthalene*                            | No  | Yes | -35.2 ± 7.4  | 0.2  | 37 |

|                            |                                 |                                            |    |     |              |      |    |
|----------------------------|---------------------------------|--------------------------------------------|----|-----|--------------|------|----|
| 96                         | C <sub>10</sub> H <sub>10</sub> | dihydroNaphth                              | No | Yes | —            | 0.1  | 40 |
| 97                         | C <sub>11</sub> H <sub>10</sub> | Methylnaphthalene                          | No | Yes | —            | 0.1  | 40 |
| 98                         | C <sub>12</sub> H <sub>8</sub>  | Acenaphthalene                             | No | Yes | —            | 0.0  | 40 |
| 99                         | C <sub>12</sub> H <sub>10</sub> | acenaphthene                               | No | Yes | —            | 0.0  | 40 |
| 100                        | C <sub>12</sub> H <sub>12</sub> | diMetNap                                   | No | Yes | —            | 0.0  | 40 |
| 101                        | C <sub>13</sub> H <sub>10</sub> | Fluorene                                   | No | Yes | —            | 0.0  | 40 |
| 102                        | C <sub>14</sub> H <sub>10</sub> | Phenanthrene, Anthracene                   | No | Yes | —            | 0.0  | 41 |
| 103                        | C <sub>16</sub> H <sub>10</sub> | Pyrene, Fluoranthene                       | No | Yes | —            | 0.0  | 41 |
| <b>Higher alkanes (14)</b> |                                 |                                            |    |     |              |      |    |
| 104                        | C <sub>8</sub> H <sub>18</sub>  | C8 Alkanes*                                | No | Yes | -34.0 ± 3.2  | 12.2 | 39 |
| 105                        | C <sub>9</sub> H <sub>20</sub>  | C9 Alkanes*                                | No | Yes | -28.4 ± 1.3  | 7.3  | 31 |
| 106                        | C <sub>10</sub> H <sub>22</sub> | C10 Alkanes*                               | No | Yes | -21.9 ± 1.4  | 4.2  | 25 |
| 107                        | C <sub>11</sub> H <sub>24</sub> | C11 Alkanes*                               | No | Yes | -18.6 ± 1.3  | 3.2  | 23 |
| 108                        | C <sub>12</sub> H <sub>26</sub> | C12 Alkanes*                               | No | Yes | -16.4 ± 3.4  | 3.3  | 22 |
| 109                        | C <sub>13</sub> H <sub>28</sub> | C13 Alkanes*                               | No | Yes | -10.8 ± 15.9 | 2.4  | 22 |
| 110                        | C <sub>14</sub> H <sub>30</sub> | C14 Alkanes*                               | No | Yes | -0.5 ± 30.8  | 2.6  | 17 |
| 111                        | C <sub>15</sub> H <sub>32</sub> | C15 Alkanes*                               | No | Yes | -19.0 ± 26.7 | 2.1  | 23 |
| 112                        | C <sub>16</sub> H <sub>34</sub> | C16 Alkanes                                | No | Yes | —            | 3.4  | 27 |
| 113                        | C <sub>17</sub> H <sub>36</sub> | C17 Alkanes                                | No | Yes | —            | 2.3  | 27 |
| 114                        | C <sub>18</sub> H <sub>38</sub> | C18 Alkanes                                | No | Yes | —            | 2.3  | 27 |
| 115                        | C <sub>19</sub> H <sub>40</sub> | C19 Alkanes                                | No | Yes | —            | 2.8  | 27 |
| 116                        | C <sub>20</sub> H <sub>42</sub> | C20 Alkanes                                | No | Yes | —            | 3.5  | 27 |
| 117                        | C <sub>21</sub> H <sub>44</sub> | C21 Alkanes                                | No | Yes | —            | 4.0  | 27 |
| <b>N-containing (8)</b>    |                                 |                                            |    |     |              |      |    |
| 118                        | C <sub>2</sub> H <sub>3</sub> N | Acetonitrile*                              | No | Yes | -17.0 ± 10.5 | 43.5 | 23 |
| 119                        | C <sub>2</sub> H <sub>5</sub> N | Ethenamine                                 | No | Yes | —            | 1.6  | 25 |
| 120                        | C <sub>2</sub> H <sub>7</sub> N | C2 amines                                  | No | Yes | —            | 1.3  | 25 |
| 121                        | C <sub>3</sub> H <sub>3</sub> N | Acrylonitrile                              | No | Yes | -13.9 ± 1.4  | 0.7  | 16 |
| 122                        | C <sub>3</sub> H <sub>5</sub> N | Propanenitrile                             | No | Yes | —            | 0.8  | 24 |
| 123                        | C <sub>3</sub> H <sub>9</sub> N | C3 amines                                  | No | Yes | —            | 0.2  | 24 |
| 124                        | C <sub>4</sub> H <sub>5</sub> N | Pyrrrole                                   | No | Yes | —            | 0.4  | 23 |
| 125                        | C <sub>4</sub> H <sub>7</sub> N | Dihydropyrrrole, butane nitrile, pyrroline | No | Yes | —            | 0.5  | 25 |

<sup>a</sup> GC-FID/MS measured concentrations for overlapped ROG species by both two instruments were used in this study.

<sup>b</sup>The species with star mark was the standard species for Vocus PTR-ToF-MS calibration.

<sup>c</sup>Formaldehyde discussed in this study was estimated from previous studies(Cai et al., 2019; Stockwell et al., 2015).

<sup>d</sup>In total, loss fraction of 81 species were determined.

**Table S3.** Emission ratio relative to benzene of individual species in different fuels.

| Number | Formula                        | Name                   | Emission ratio ( $\mu\text{g mg}^{-1}$ ) |                |                 |          |            |            |
|--------|--------------------------------|------------------------|------------------------------------------|----------------|-----------------|----------|------------|------------|
|        |                                |                        | Anthracites                              | Briquettes     | Wood            | Corn cob | Corn straw | Bean straw |
| 1      | C <sub>2</sub> H <sub>6</sub>  | Ethane                 | 2713.8 ± 1519.3                          | 1708.6 ± 695.7 | 1049.9 ± 1125.1 | 1047.5   | 2168.9     | 5022.1     |
| 2      | C <sub>3</sub> H <sub>8</sub>  | Propane                | 829.2 ± 389.7                            | 356.6 ± 222.4  | 336.3 ± 390.0   | 392.9    | 453.1      | 1277.8     |
| 3      | C <sub>4</sub> H <sub>10</sub> | Isobutane              | 139.3 ± 84.7                             | 65.5 ± 61.4    | 28.5 ± 26.3     | 27.4     | 37.4       | 61.8       |
| 4      | C <sub>4</sub> H <sub>10</sub> | n-Butane               | 265.4 ± 93.6                             | 122.2 ± 77.3   | 92.4 ± 92.6     | 117.6    | 106.7      | 263.6      |
| 5      | C <sub>5</sub> H <sub>12</sub> | Cyclopentane           | 8.7 ± 2.0                                | 8.5 ± 6.7      | 2.3 ± 2.7       | 2.6      | 2.2        | 9.7        |
| 6      | C <sub>5</sub> H <sub>12</sub> | Isopentane             | 79.1 ± 73.4                              | 53.3 ± 64.3    | 16.1 ± 16.3     | 22.4     | 20.3       | 40.3       |
| 7      | C <sub>5</sub> H <sub>12</sub> | n-Pentane              | 94.9 ± 55.0                              | 52.5 ± 37.2    | 44.4 ± 45.3     | 63.9     | 32.7       | 94.3       |
| 8      | C <sub>6</sub> H <sub>12</sub> | Methylcyclopentane     | 19.4 ± 15.7                              | 10.3 ± 4.7     | 9.4 ± 6.5       | 12.9     | 14.6       | 18.0       |
| 9      | C <sub>6</sub> H <sub>12</sub> | Cyclohexane            | 7.1 ± 3.9                                | 6.1 ± 2.5      | 1.8 ± 1.9       | 1.5      | 1.2        | 2.6        |
| 10     | C <sub>6</sub> H <sub>14</sub> | 2,2-Dimethylbutane     | 0.9 ± 0.7                                | 0.9 ± 0.3      | 0.2 ± 0.2       | 0.2      | 0.2        | 0.4        |
| 11     | C <sub>6</sub> H <sub>14</sub> | 2,3-Dimethylbutane     | 1.3 ± 0.7                                | 1.8 ± 1.5      | 1.4 ± 2.7       | 0.8      | 5.9        | 1.3        |
| 12     | C <sub>6</sub> H <sub>14</sub> | 2-Methylpentane        | 15.1 ± 11.1                              | 10.4 ± 6.0     | 5.1 ± 4.7       | 7.2      | 4.9        | 10.7       |
| 13     | C <sub>6</sub> H <sub>14</sub> | 3-Methylpentane        | 6.1 ± 3.5                                | 4.8 ± 3.6      | 1.8 ± 2.1       | 1.9      | 0.2        | 4.6        |
| 14     | C <sub>6</sub> H <sub>14</sub> | n-Hexane               | 34.2 ± 24.5                              | 22.0 ± 12.4    | 17.3 ± 21.6     | 18.5     | 14.4       | 30.7       |
| 15     | C <sub>7</sub> H <sub>14</sub> | Methylcyclohexane      | 7.8 ± 3.7                                | 7.0 ± 3.0      | 2.4 ± 2.3       | 3.5      | 1.7        | 2.7        |
| 16     | C <sub>7</sub> H <sub>16</sub> | 2,4-Dimethylpentane    | 14.1 ± 14.4                              | 11.7 ± 17.1    | 46.5 ± 119.1    | 0.6      | 16.5       | 856.5      |
| 17     | C <sub>7</sub> H <sub>16</sub> | 2-Methylhexane         | 6.1 ± 4.5                                | 4.3 ± 3.4      | 1.2 ± 0.8       | 2.4      | 2.3        | 5.4        |
| 18     | C <sub>7</sub> H <sub>16</sub> | 2,3-Dimethylpentane    | 5.0 ± 4.9                                | 3.3 ± 3.2      | 1.3 ± 1.4       | 2.5      | 1.3        | 3.4        |
| 19     | C <sub>7</sub> H <sub>16</sub> | 3-Methylhexane         | 3.7 ± 1.9                                | 3.8 ± 3.7      | 1.7 ± 1.1       | 4.8      | 13.0       | 1.6        |
| 20     | C <sub>7</sub> H <sub>16</sub> | n-Heptane              | 27.6 ± 26.0                              | 12.9 ± 12.6    | 16.5 ± 13.4     | 22.0     | 8.3        | 15.3       |
| 21     | C <sub>8</sub> H <sub>18</sub> | 2,2,4-Trimethylpentane | 0.9 ± 0.9                                | 1.5 ± 2.9      | 0.5 ± 0.8       | 0.1      | 9.1        | 0.2        |

|    |                                 |                            |                |                 |                 |        |         |        |
|----|---------------------------------|----------------------------|----------------|-----------------|-----------------|--------|---------|--------|
| 22 | C <sub>8</sub> H <sub>18</sub>  | 2,3,4-Trimethylpentane     | 1.9 ± 1.8      | 2.2 ± 2.8       | 0.3 ± 0.3       | 0.1    | 0.1     | 0.6    |
| 23 | C <sub>8</sub> H <sub>18</sub>  | 2-Methylheptane            | 12.3 ± 11.0    | 8.2 ± 6.9       | 4.9 ± 3.9       | 6.6    | 3.1     | 4.0    |
| 24 | C <sub>8</sub> H <sub>18</sub>  | 3-Methylheptane            | 9.4 ± 7.8      | 4.6 ± 3.7       | 3.2 ± 2.1       | 3.1    | 2.1     | 2.5    |
| 25 | C <sub>8</sub> H <sub>18</sub>  | n-Octane                   | 34.7 ± 23.2    | 25.2 ± 14.6     | 15.2 ± 11.6     | 18.2   | 9.6     | 10.2   |
| 26 | C <sub>9</sub> H <sub>20</sub>  | n-Nonane                   | 26.8 ± 18.7    | 21.7 ± 15.4     | 9.0 ± 8.1       | 11.4   | 4.3     | 2.4    |
| 27 | C <sub>10</sub> H <sub>22</sub> | n-Decane                   | 34.0 ± 21.9    | 35.4 ± 28.3     | 7.6 ± 6.2       | 7.5    | 3.9     | 4.4    |
| 28 | C <sub>2</sub> H <sub>4</sub>   | Ethylene                   | 1944.1 ± 957.8 | 2019.3 ± 1089.0 | 3019.6 ± 1283.7 | 2429.3 | 20434.6 | 5954.7 |
| 29 | C <sub>3</sub> H <sub>6</sub>   | Propylene                  | 845.8 ± 567.7  | 465.8 ± 338.0   | 993.0 ± 670.6   | 1052.1 | 3463.9  | 3077.6 |
| 30 | C <sub>4</sub> H <sub>8</sub>   | Trans-2-butene             | 86.6 ± 68.6    | 33.3 ± 36.9     | 72.7 ± 82.1     | 79.1   | 126.2   | 303.6  |
| 31 | C <sub>4</sub> H <sub>8</sub>   | 1-Butene                   | 170.3 ± 131.3  | 85.6 ± 75.4     | 221.8 ± 162.6   | 277.3  | 513.5   | 627.0  |
| 32 | C <sub>4</sub> H <sub>8</sub>   | Cis-2-butene               | 61.3 ± 46.2    | 24.2 ± 26.8     | 52.4 ± 58.0     | 56.9   | 93.4    | 218.9  |
| 33 | C <sub>5</sub> H <sub>10</sub>  | 1-Pentene                  | 43.1 ± 35.9    | 26.0 ± 20.1     | 60.4 ± 57.0     | 73.8   | 76.9    | 109.5  |
| 34 | C <sub>5</sub> H <sub>10</sub>  | Trans-2-pentene            | 30.2 ± 25.3    | 15.3 ± 12.7     | 25.9 ± 28.8     | 25.6   | 42.2    | 92.1   |
| 35 | C <sub>5</sub> H <sub>10</sub>  | Cis-2-pentene              | 26.2 ± 19.3    | 9.7 ± 6.6       | 14.8 ± 16.4     | 15.9   | 20.7    | 52.8   |
| 36 | C <sub>6</sub> H <sub>12</sub>  | 1-Hexene                   | 65.6 ± 71.6    | 41.0 ± 30.4     | 92.4 ± 73.3     | 157.8  | 149.1   | 110.2  |
| 37 | C <sub>2</sub> H <sub>2</sub>   | Acetylene                  | 259.2 ± 181.4  | 631.5 ± 422.2   | 1259.7 ± 598.9  | 590.4  | 1751.7  | 1026.2 |
| 38 | C <sub>6</sub> H <sub>6</sub>   | Benzene                    | 1000.0 ± 0.0   | 1000.0 ± 0.0    | 1000.0 ± 0.0    | 1000.0 | 1000.0  | 1000.0 |
| 39 | C <sub>7</sub> H <sub>8</sub>   | Toluene                    | 567.3 ± 233.2  | 356.9 ± 146.8   | 362.3 ± 183.2   | 267.8  | 786.0   | 317.7  |
| 40 | C <sub>8</sub> H <sub>8</sub>   | Styrene                    | 129.0 ± 123.4  | 83.8 ± 39.0     | 80.9 ± 50.7     | 74.5   | 355.4   | 16.7   |
| 41 | C <sub>8</sub> H <sub>10</sub>  | Ethylbenzene               | 79.3 ± 51.2    | 58.0 ± 24.5     | 53.1 ± 26.3     | 37.3   | 123.3   | 16.3   |
| 42 | C <sub>8</sub> H <sub>10</sub>  | m/p-Xylene                 | 238.5 ± 136.0  | 144.3 ± 72.4    | 76.8 ± 54.2     | 68.1   | 97.0    | 49.2   |
| 43 | C <sub>8</sub> H <sub>10</sub>  | o-Xylene                   | 82.2 ± 47.5    | 53.9 ± 26.9     | 28.9 ± 21.4     | 21.0   | 40.7    | 16.0   |
| 44 | C <sub>9</sub> H <sub>12</sub>  | iso-Propylbenzene (Cumene) | 7.1 ± 4.6      | 9.0 ± 9.1       | 2.5 ± 1.2       | 1.7    | 7.1     | 1.1    |
| 45 | C <sub>9</sub> H <sub>12</sub>  | n-Propylbenzene            | 18.9 ± 12.7    | 19.5 ± 15.4     | 6.2 ± 4.2       | 4.8    | 7.8     | 2.2    |
| 46 | C <sub>9</sub> H <sub>12</sub>  | m-Ethyltoluene             | 42.6 ± 31.4    | 32.8 ± 20.4     | 11.1 ± 7.6      | 9.1    | 12.6    | 5.3    |
| 47 | C <sub>9</sub> H <sub>12</sub>  | p-Ethyltoluene             | 30.5 ± 22.5    | 26.5 ± 20.0     | 7.4 ± 4.9       | 6.6    | 7.1     | 4.1    |
| 48 | C <sub>9</sub> H <sub>12</sub>  | 1,3,5-Trimethylbenzene     | 23.7 ± 16.6    | 21.9 ± 16.8     | 5.3 ± 4.3       | 4.3    | 3.0     | 2.7    |
| 49 | C <sub>9</sub> H <sub>12</sub>  | o-Ethyltoluene             | 28.1 ± 19.9    | 25.7 ± 19.7     | 7.8 ± 5.6       | 5.0    | 7.8     | 3.2    |
| 50 | C <sub>9</sub> H <sub>12</sub>  | 1,2,4-Trimethylbenzene     | 70.0 ± 56.8    | 48.1 ± 31.8     | 14.5 ± 11.8     | 9.9    | 10.0    | 7.3    |

|    |                                              |                                                |                 |                 |                 |              |              |              |
|----|----------------------------------------------|------------------------------------------------|-----------------|-----------------|-----------------|--------------|--------------|--------------|
| 51 | C <sub>9</sub> H <sub>12</sub>               | 1,2,3-Trimethylbenzene                         | 48.4 ± 39.4     | 41.9 ± 33.2     | 8.3 ± 6.2       | 5.9          | 4.5          | 4.6          |
| 52 | C <sub>10</sub> H <sub>14</sub>              | m-Diethylbenzene                               | 12.2 ± 8.5      | 20.2 ± 26.7     | 1.5 ± 0.9       | 0.8          | 1.0          | 1.9          |
| 53 | C <sub>10</sub> H <sub>14</sub>              | p-Diethylbenzene                               | 29.2 ± 23.4     | 30.6 ± 29.6     | 4.1 ± 2.9       | 2.6          | 2.4          | 3.7          |
| 54 | C <sub>10</sub> H <sub>16</sub>              | alpha-Pinene                                   | 3.7 ± 4.4       | 1.0 ± 0.7       | 1.0 ± 1.3       | 0.5          | 0.7          | 0.3          |
| 55 | C <sub>10</sub> H <sub>16</sub>              | beta-Pinene                                    | 2.8 ± 4.3       | 0.5 ± 0.5       | 0.5 ± 0.5       | 0.3          | 0.2          | 0.3          |
| 56 | C <sub>10</sub> H <sub>16</sub>              | Cinene(Limonene)                               | 193.6 ± 264.8   | 69.3 ± 58.5     | 86.2 ± 115.7    | 119.1        | 6.9          | 13.5         |
| 57 | C <sub>5</sub> H <sub>8</sub>                | Isoprene                                       | 24.7 ± 21.0     | 11.7 ± 17.4     | 24.5 ± 42.5     | 7.7          | 11.5         | 291.9        |
| 58 | C <sub>4</sub> H <sub>6</sub> O              | Methacrolein                                   | 189.6 ± 162.7   | 122.8 ± 86.7    | 220.5 ± 156.1   | 266.3        | 525.3        | 414.1        |
| 59 | C <sub>4</sub> H <sub>6</sub> O              | Methyl vinyl ketone                            | 933.7 ± 1094.1  | 377.8 ± 315.3   | 592.0 ± 304.9   | 785.5        | 1469.5       | 1072.1       |
| 60 | C <sub>3</sub> H <sub>4</sub> O              | Acrolein                                       | 2653.4 ± 2492.5 | 1664.7 ± 1313.5 | 2492.8 ± 1229.3 | 2683.4       | 7437.6       | 6116.1       |
| 61 | C <sub>3</sub> H <sub>6</sub> O              | Propanal                                       | 838.9 ± 646.7   | 464.9 ± 420.5   | 969.7 ± 502.8   | 1151.0       | 1792.8       | 2980.5       |
| 62 | C <sub>3</sub> H <sub>6</sub> O              | Acetone                                        | 8404.5 ± 8112.2 | 2526.9 ± 1872.0 | 3826.5 ± 3651.0 | 3681.0       | 4654.4       | 12189.5      |
| 63 | C <sub>4</sub> H <sub>6</sub> O              | Crotonaldehyde                                 | 676.5 ± 755.0   | 327.2 ± 324.3   | 233.7 ± 131.9   | 61.1         | 531.1        | 274.7        |
| 64 | C <sub>4</sub> H <sub>8</sub> O              | n-Butanal                                      | 165.6 ± 121.6   | 131.8 ± 159.0   | 136.0 ± 94.9    | 177.5        | 229.6        | 301.0        |
| 65 | C <sub>4</sub> H <sub>8</sub> O              | Methyl ethyl ketone                            | 1746.3 ± 1795.9 | 502.6 ± 467.5   | 762.5 ± 729.0   | 1086.5       | 1093.7       | 1858.9       |
| 66 | C <sub>5</sub> H <sub>10</sub> O             | 2-Pentanone                                    | 164.7 ± 162.1   | 47.4 ± 44.2     | 58.5 ± 51.5     | 53.8         | 47.9         | 100.9        |
| 67 | C <sub>5</sub> H <sub>10</sub> O             | n-Pentanal                                     | 197.1 ± 186.5   | 170.2 ± 208.4   | 108.2 ± 53.2    | 156.3        | 109.7        | 74.0         |
| 68 | C <sub>5</sub> H <sub>10</sub> O             | 3-Pentanone                                    | 55.8 ± 53.2     | 15.7 ± 14.7     | 22.5 ± 19.0     | 26.2         | 21.9         | 35.7         |
| 69 | C <sub>2</sub> H <sub>4</sub> O              | Acetaldehyde                                   | 942.7 ± 748.7   | 605.1 ± 389.0   | 1054.3 ± 569.9  | 1432.2       | 1825.6       | 3554.3       |
| 70 | CH <sub>2</sub> O                            | Formaldehyde                                   | 2125 ± 581.1    | 2125 ± 581.1    | 2856 ± 532.9    | 2848 ± 555.3 | 2848 ± 555.3 | 2848 ± 555.3 |
| 71 | C <sub>3</sub> H <sub>4</sub> O <sub>2</sub> | Methylglyoxal, acrylic acid<br>(AcryAcid_Mgly) | 78.9 ± 85.1     | 70.5 ± 66.7     | 13.9 ± 8.8      | 12.3         | 18.0         | 62.2         |
| 72 | C <sub>5</sub> H <sub>4</sub> O              | Cyclopentadienone                              | 1336.1 ± 2106.0 | 112.3 ± 138.7   | 66.8 ± 96.9     | 65.3         | 121.2        | 33.0         |
| 73 | C <sub>5</sub> H <sub>8</sub> O              | EVK, Dihydromethylfuran,<br>cyclopentanone     | 1839.1 ± 2062.5 | 330.1 ± 408.8   | 414.2 ± 357.3   | 457.6        | 409.2        | 550.7        |
| 74 | C <sub>7</sub> H <sub>6</sub> O              | Benzaldehyde                                   | 337.9 ± 380.3   | 103.4 ± 51.1    | 71.2 ± 36.1     | 65.3         | 113.1        | 8.8          |
| 75 | C <sub>8</sub> H <sub>6</sub> O              | benzofuran                                     | 231.3 ± 246.8   | 67.5 ± 54.5     | 59.1 ± 44.3     | 41.6         | 87.8         | 4.7          |
| 76 | C <sub>4</sub> H <sub>4</sub> O              | Furan                                          | 1489.0 ± 1726.1 | 451.8 ± 780.5   | 741.1 ± 835.3   | 713.8        | 920.7        | 1872.7       |
| 77 | C <sub>4</sub> H <sub>8</sub> O              | Tetrahydrofuran                                | 527.4 ± 640.1   | 110.4 ± 122.5   | 124.3 ± 150.8   | 88.0         | 77.9         | 100.2        |



|     |                                               |                                      |                   |                 |                |       |       |        |
|-----|-----------------------------------------------|--------------------------------------|-------------------|-----------------|----------------|-------|-------|--------|
| 78  | C <sub>5</sub> H <sub>6</sub> O               | Methyl furan                         | 5654.4 ± 7399.9   | 954.4 ± 1275.5  | 987.4 ± 1258.0 | 883.3 | 763.2 | 2035.8 |
| 79  | C <sub>4</sub> H <sub>4</sub> O <sub>2</sub>  | Furanone                             | 744.7 ± 873.2     | 176.1 ± 115.8   | 58.1 ± 50.8    | 87.4  | 66.1  | 17.9   |
| 80  | C <sub>5</sub> H <sub>4</sub> O <sub>2</sub>  | Furfural                             | 14120.4 ± 18694.4 | 1457.6 ± 1830.3 | 920.7 ± 987.8  | 662.8 | 495.6 | 187.6  |
| 81  | C <sub>6</sub> H <sub>8</sub> O               | Dimethylfuran                        | 3903.1 ± 5098.9   | 569.7 ± 513.1   | 373.3 ± 428.7  | 312.8 | 229.0 | 345.1  |
| 82  | C <sub>5</sub> H <sub>6</sub> O <sub>2</sub>  | Furfuryl alcohol, PentynoicAcid      | 1188.0 ± 1534.8   | 197.4 ± 133.5   | 86.8 ± 91.8    | 90.8  | 99.9  | 30.8   |
| 83  | C <sub>7</sub> H <sub>10</sub> O              | TriMetfuran                          | 2317.1 ± 3058.2   | 347.4 ± 284.7   | 165.2 ± 188.9  | 134.2 | 69.8  | 55.2   |
| 84  | C <sub>6</sub> H <sub>8</sub> O <sub>2</sub>  | DiMetfuranone                        | 944.6 ± 1281.7    | 187.2 ± 132.9   | 67.7 ± 62.9    | 65.2  | 93.2  | 22.2   |
| 85  | C <sub>8</sub> H <sub>12</sub> O              | butylfuran                           | 1083.4 ± 1458.3   | 167.0 ± 139.4   | 67.2 ± 74.8    | 51.7  | 22.5  | 13.2   |
| 86  | C <sub>6</sub> H <sub>6</sub> O               | Phenol                               | 3762.9 ± 5889.4   | 574.3 ± 526.1   | 443.5 ± 451.8  | 258.1 | 908.1 | 281.9  |
| 87  | C <sub>7</sub> H <sub>8</sub> O               | Cresols                              | 2017.8 ± 3924.1   | 166.0 ± 277.1   | 76.9 ± 150.0   | 41.5  | 24.5  | 25.3   |
| 88  | C <sub>6</sub> H <sub>6</sub> O <sub>2</sub>  | Benzenediols, methylfurfural         | 3372.0 ± 4703.2   | 407.2 ± 292.3   | 175.9 ± 196.4  | 114.2 | 118.2 | 38.5   |
| 89  | C <sub>8</sub> H <sub>10</sub> O              | C2 phenols (Dimethylphenol)          | 1248.1 ± 2563.9   | 94.9 ± 151.4    | 35.1 ± 54.5    | 24.3  | 12.6  | 8.5    |
| 90  | C <sub>7</sub> H <sub>8</sub> O <sub>2</sub>  | Guaiacol, methyl benzenediols        | 1995.4 ± 4089.5   | 128.8 ± 143.4   | 41.2 ± 43.9    | 26.3  | 26.8  | 8.7    |
| 91  | C <sub>9</sub> H <sub>12</sub> O              | Trimethylphenol                      | 432.0 ± 795.3     | 36.5 ± 42.0     | 14.6 ± 19.3    | 10.0  | 4.8   | 3.0    |
| 92  | C <sub>10</sub> H <sub>8</sub> O              | Naphthalenol                         | 132.5 ± 185.6     | 32.5 ± 22.6     | 5.9 ± 7.2      | 3.5   | 2.8   | 7.2    |
| 93  | C <sub>10</sub> H <sub>12</sub> O             | methyl chavicol                      | 173.9 ± 230.0     | 40.3 ± 29.1     | 10.4 ± 11.9    | 6.7   | 2.7   | 4.3    |
| 94  | C <sub>8</sub> H <sub>10</sub> O <sub>3</sub> | Syringol                             | 40.7 ± 50.8       | 21.2 ± 18.8     | 2.6 ± 2.8      | 1.1   | 1.3   | 0.5    |
| 95  | C <sub>10</sub> H <sub>8</sub>                | naphthalene                          | 2325.2 ± 1892.3   | 1790.4 ± 1896.7 | 176.4 ± 105.6  | 107.0 | 126.8 | 540.0  |
| 96  | C <sub>10</sub> H <sub>10</sub>               | dihydroNaphth                        | 94.6 ± 92.4       | 40.3 ± 39.3     | 18.0 ± 20.5    | 12.8  | 9.0   | 2.5    |
| 97  | C <sub>11</sub> H <sub>10</sub>               | Methylnaphthalene                    | 560.8 ± 625.0     | 188.8 ± 271.0   | 42.6 ± 49.9    | 28.8  | 9.2   | 14.0   |
| 98  | C <sub>12</sub> H <sub>8</sub>                | Acenaphthalene                       | 109.4 ± 217.4     | 13.2 ± 15.9     | 2.7 ± 5.2      | 0.9   | 0.6   | 1.3    |
| 99  | C <sub>12</sub> H <sub>10</sub>               | acenaphthene                         | 250.6 ± 313.4     | 95.7 ± 74.7     | 18.9 ± 20.5    | 9.7   | 8.4   | 5.8    |
| 100 | C <sub>12</sub> H <sub>12</sub>               | diMetNap                             | 308.7 ± 370.9     | 115.3 ± 178.4   | 29.5 ± 37.8    | 15.9  | 4.1   | 9.5    |
| 101 | C <sub>13</sub> H <sub>10</sub>               | Fluorene                             | 20.5 ± 30.7       | 9.7 ± 13.2      | 1.6 ± 1.4      | 0.6   | 0.6   | 4.7    |
| 102 | C <sub>14</sub> H <sub>10</sub>               | Phenanthrene, anthracene<br>(PA_Ant) | 6.4 ± 6.6         | 3.6 ± 3.1       | 0.6 ± 0.5      | 0.1   | 0.3   | 0.7    |
| 103 | C <sub>16</sub> H <sub>10</sub>               | Pyrene, Fluoranthene                 | 0.6 ± 0.7         | 0.2 ± 0.1       | 0.1 ± 0.1      | 0.0   | 0.1   | 0.0    |
| 104 | C <sub>8</sub> H <sub>18</sub>                | C8 Alkanes                           | 161.2 ± 109.4     | 169.3 ± 151.2   | 58.1 ± 39.3    | 72.0  | 35.0  | 48.7   |
| 105 | C <sub>9</sub> H <sub>20</sub>                | C9 Alkanes                           | 134.1 ± 97.6      | 141.0 ± 128.4   | 49.4 ± 32.2    | 70.8  | 23.0  | 22.5   |

|     |                                 |                                                                    |                 |                 |                 |        |        |        |
|-----|---------------------------------|--------------------------------------------------------------------|-----------------|-----------------|-----------------|--------|--------|--------|
| 106 | C <sub>10</sub> H <sub>22</sub> | C10 Alkanes                                                        | 106.5 ± 73.9    | 111.6 ± 101.2   | 36.3 ± 28.2     | 45.4   | 16.2   | 12.6   |
| 107 | C <sub>11</sub> H <sub>24</sub> | C11 Alkanes                                                        | 84.3 ± 65.3     | 93.9 ± 91.0     | 28.2 ± 21.4     | 31.3   | 9.6    | 10.5   |
| 108 | C <sub>12</sub> H <sub>26</sub> | C12 Alkanes                                                        | 96.5 ± 86.3     | 107.4 ± 95.3    | 23.0 ± 17.5     | 16.9   | 3.4    | 9.6    |
| 109 | C <sub>13</sub> H <sub>28</sub> | C13 Alkanes                                                        | 164.5 ± 151.8   | 176.6 ± 153.1   | 29.0 ± 24.5     | 18.3   | 1.3    | 11.4   |
| 110 | C <sub>14</sub> H <sub>30</sub> | C14 Alkanes                                                        | 298.0 ± 300.5   | 306.3 ± 288.7   | 43.0 ± 45.3     | 26.0   | 4.6    | 21.3   |
| 111 | C <sub>15</sub> H <sub>32</sub> | C15 Alkanes                                                        | 497.7 ± 515.5   | 723.1 ± 933.1   | 73.1 ± 78.4     | 46.3   | 6.7    | 42.3   |
| 112 | C <sub>16</sub> H <sub>34</sub> | C16 Alkanes                                                        | 354.9 ± 370.6   | 562.7 ± 783.3   | 46.3 ± 47.1     | 28.6   | 2.9    | 32.7   |
| 113 | C <sub>17</sub> H <sub>36</sub> | C17 Alkanes                                                        | 216.9 ± 210.3   | 265.8 ± 327.3   | 24.1 ± 20.0     | 10.8   | 1.5    | 29.5   |
| 114 | C <sub>18</sub> H <sub>38</sub> | C18 Alkanes                                                        | 161.7 ± 156.8   | 153.5 ± 147.5   | 17.9 ± 14.2     | 7.9    | 0.9    | 27.4   |
| 115 | C <sub>19</sub> H <sub>40</sub> | C19 Alkanes                                                        | 96.7 ± 91.4     | 72.4 ± 55.9     | 10.8 ± 8.5      | 4.9    | 0.5    | 15.4   |
| 116 | C <sub>20</sub> H <sub>42</sub> | C20 Alkanes                                                        | 57.0 ± 49.4     | 44.1 ± 44.2     | 6.4 ± 4.9       | 2.7    | 0.2    | 13.3   |
| 117 | C <sub>21</sub> H <sub>44</sub> | C21 Alkanes                                                        | 41.0 ± 34.3     | 33.6 ± 38.6     | 4.2 ± 3.0       | 2.8    | 0.1    | 9.9    |
| 118 | C <sub>2</sub> H <sub>3</sub> N | Acetonitrile                                                       | 3273.2 ± 2921.0 | 2628.6 ± 1550.5 | 1879.6 ± 1117.9 | 2003.1 | 5377.2 | 3826.7 |
| 119 | C <sub>2</sub> H <sub>5</sub> N | Ethenamine                                                         | 4.8 ± 5.5       | 2.3 ± 1.5       | 1.1 ± 0.6       | 1.6    | 2.0    | 3.3    |
| 120 | C <sub>2</sub> H <sub>7</sub> N | Dimethylamine, Ethylamine                                          | 2.2 ± 2.2       | 1.2 ± 0.8       | 1.5 ± 3.5       | 0.1    | 0.4    | 0.3    |
| 121 | C <sub>3</sub> H <sub>3</sub> N | Acrylonitrile                                                      | 163.7 ± 153.7   | 315.3 ± 301.7   | 386.6 ± 344.1   | 301.1  | 3491.1 | 146.9  |
| 122 | C <sub>3</sub> H <sub>5</sub> N | Propanenitrile                                                     | 170.5 ± 232.1   | 69.9 ± 54.8     | 144.3 ± 141.0   | 188.6  | 685.1  | 144.0  |
| 123 | C <sub>3</sub> H <sub>9</sub> N | Trimethylamine, 1-Propanamine,<br>2-Propanamine, Methyl ethylamine | 1.0 ± 1.2       | 0.6 ± 0.6       | 0.1 ± 0.1       | 0.0    | 0.2    | 0.2    |
| 124 | C <sub>4</sub> H <sub>5</sub> N | Pyrrole                                                            | 326.8 ± 425.7   | 70.4 ± 135.3    | 104.9 ± 96.0    | 163.5  | 474.6  | 38.7   |
| 125 | C <sub>4</sub> H <sub>7</sub> N | Dihydropyrrole,<br>butane nitrile, pyrroline                       | 47.7 ± 62.8     | 21.2 ± 17.7     | 47.4 ± 49.6     | 68.7   | 168.4  | 31.8   |

**Table S4.** Annual consumption of residential coal and biomass combustion in China mainland.

| Year | Residential coal consumption<br>(10 <sup>4</sup> t) | Biomass combustion<br>(10 <sup>8</sup> t) |
|------|-----------------------------------------------------|-------------------------------------------|
| 2010 | 9159                                                | 3.1                                       |
| 2011 | 9212                                                | 3.1                                       |
| 2012 | 9253                                                | 3.0                                       |
| 2013 | 9290                                                | 2.9                                       |
| 2014 | 9303                                                | 2.8                                       |
| 2015 | 9627                                                | 2.7                                       |
| 2016 | 9492                                                | 2.6                                       |
| 2017 | 9283                                                | 2.2                                       |
| 2018 | 7714                                                | 2.3                                       |
| 2019 | 6547                                                | 2.2                                       |

**Table S5.** Annual consumption of residential coal and biomass combustion by province in 2019 and 2017, respectively.

| NO. | Region                | Residential coal consumption<br>(10 <sup>4</sup> t) | Biomass<br>combustion<br>(10 <sup>4</sup> t) |
|-----|-----------------------|-----------------------------------------------------|----------------------------------------------|
| 1   | Beijing               | 48.7                                                | 5.1                                          |
| 2   | Tianjin               | 38.2                                                | 60.1                                         |
| 3   | Hebei <sup>a</sup>    | 1313.3                                              | 178.8                                        |
| 4   | Shanxi                | 422.7                                               | 288.2                                        |
| 5   | Inner Mongolia        | 333.7                                               | 60.1                                         |
| 6   | Liaoning <sup>a</sup> | 413.6                                               | 244.4                                        |
| 7   | Jilin                 | 188.5                                               | 1242.9                                       |
| 8   | Heilongjiang          | 273.2                                               | 2845.7                                       |
| 9   | Shanghai              | 4.1                                                 | 20.2                                         |
| 10  | Jiangsu               | -                                                   | 1470.1                                       |
| 11  | Zhejiang              | 28.2                                                | 163.9                                        |
| 12  | Anhui                 | 35.0                                                | 1480.3                                       |
| 13  | Fujian                | 21.4                                                | 104.1                                        |
| 14  | Jiangxi               | 250.1                                               | 894.1                                        |
| 15  | Shandong              | 478.7                                               | 1600.0                                       |
| 16  | Henan                 | 331.6                                               | 1700.0                                       |
| 17  | Hubei                 | 501.5                                               | 1138.1                                       |
| 18  | Hunan                 | 408.4                                               | 1488.5                                       |
| 19  | Guangdong             | 65.9                                                | 862.7                                        |
| 20  | Guangxi               | 0.9                                                 | 970.0                                        |
| 21  | Hainan                | -                                                   | 101.4                                        |
| 22  | Chongqing             | 48.1                                                | 208.8                                        |
| 23  | Sichuan               | 72.1                                                | 800.0                                        |
| 24  | Guizhou               | 494.0                                               | 144.0                                        |
| 25  | Yunnan                | 327.7                                               | 500.0                                        |
| 26  | Tibet                 | -                                                   | -                                            |
| 27  | Shaanxi               | 284.7                                               | 244.1                                        |
| 28  | Gansu                 | 327.5                                               | 210.2                                        |
| 29  | Qinghai               | 65.0                                                | 23.3                                         |
| 30  | Ningxia               | 40.3                                                | 78.6                                         |
| 31  | Xinjiang              | 465.9                                               | 642.0                                        |
| 32  | National              | 6547.0                                              | 22000.0                                      |

<sup>a</sup> Consumption from biomass combustion in Hebei and Liaoning are from 2020 statistic data.

## Reference

- Akherati, A., He, Y., Coggon, M. M., Koss, A. R., Hodshire, A. L., Sekimoto, K., Warneke, C., de Gouw, J., Yee, L., Seinfeld, J. H., Onasch, T. B., Herndon, S. C., Knighton, W. B., Cappa, C. D., Kleeman, M. J., Lim, C. Y., Kroll, J. H., Pierce, J. R., and Jathar, S. H.: Oxygenated aromatic compounds are important precursors of secondary organic aerosol in biomass-burning emissions, *Environ Sci Technol*, doi.10.1021/acs.est.1020c01345, 10.1021/acs.est.0c01345, 2020.
- Cai, S., Zhu, L., Wang, S., Wisthaler, A., Li, Q., Jiang, J., and Hao, J.: Time-Resolved Intermediate-Volatility and Semivolatile Organic Compound Emissions from Household Coal Combustion in Northern China, *Environ. Sci. Technol.*, 53, 9269-9278, 10.1021/acs.est.9b00734, 2019.
- Gilman, J. B., Lerner, B. M., Kuster, W. C., Goldan, P. D., Warneke, C., Veres, P. R., Roberts, J. M., de Gouw, J. A., Burling, I. R., and Yokelson, R. J.: Biomass burning emissions and potential air quality impacts of volatile organic compounds and other trace gases from fuels common in the US, *Atmos. Chem. Phys.*, 15, 13915-13938, 10.5194/acp-15-13915-2015, 2015.
- Hatch, L. E., Yokelson, R. J., Stockwell, C. E., Veres, P. R., Simpson, I. J., Blake, D. R., Orlando, J. J., and Barsanti, K. C.: Multi-instrument comparison and compilation of non-methane organic gas emissions from biomass burning and implications for smoke-derived secondary organic aerosol precursors, *Atmos. Chem. Phys.*, 17, 1471-1489, 10.5194/acp-17-1471-2017, 2017.
- Koss, A. R., Sekimoto, K., Gilman, J. B., Selimovic, V., Coggon, M. M., Zarzana, K. J., Yuan, B., Lerner, B. M., Brown, S. S., Jimenez, J. L., Krechmer, J., Roberts, J. M., Warneke, C., Yokelson, R. J., and de Gouw, J.: Non-methane organic gas emissions from biomass burning: identification, quantification, and emission factors from PTR-ToF during the FIREX 2016 laboratory experiment, *Atmos. Chem. Phys.*, 18, 3299-3319, 10.5194/acp-18-3299-2018, 2018.
- Liu, Y., Shao, M., Fu, L., Lu, S., Zeng, L., and Tang, D.: Source profiles of volatile organic compounds (VOCs) measured in China: Part I, *Atmos. Environ.*, 42, 6247-6260, 10.1016/j.atmosenv.2008.01.070, 2008.
- Mo, Z., Shao, M., and Lu, S.: Compilation of a source profile database for hydrocarbon and OVOC emissions in China, *Atmos. Environ.*, 143, 209-217, 10.1016/j.atmosenv.2016.08.025, 2016.
- Stockwell, C. E., Veres, P. R., Williams, J., and Yokelson, R. J.: Characterization of biomass burning emissions from cooking fires, peat, crop residue, and other fuels with high-resolution proton-transfer-reaction time-of-flight mass spectrometry, *Atmos. Chem. Phys.*, 15, 845-865, 10.5194/acp-15-845-2015, 2015.
- Stockwell, C. E., Christian, T. J., Goetz, J. D., Jayarathne, T., Bhave, P. V., Praveen, P. S., Adhikari, S., Maharjan, R., DeCarlo, P. F., Stone, E. A., Saikawa, E., Blake, D. R., Simpson, I. J., Yokelson, R. J., and Panday, A. K.: Nepal Ambient Monitoring and Source Testing Experiment (NAMaSTE): emissions of trace gases and light-absorbing carbon from wood and dung cooking fires, garbage and crop residue burning, brick kilns, and other sources, *Atmos. Chem. Phys.*, 16, 11043-11081, 10.5194/acp-16-11043-2016, 2016.
- Wang, H., Lou, S., Huang, C., Qiao, L., Tang, X., Chen, C., Zeng, L., Wang, Q., Zhou, M., Lu, S., and Yu, X.: Source Profiles of Volatile Organic Compounds from Biomass Burning in Yangtze River Delta, China, *Aerosol Air Qual. Res.*, 14, 818-828, 10.4209/aaqr.2013.05.0174, 2014.
- Wu, J., Kong, S., Yan, Y., Yao, L., Yan, Q., Liu, D., Shen, G., Zhang, X., and Qi, S.: Neglected biomass burning emissions of air pollutants in China-views from the corncob burning test, emission estimation, and simulations, *Atmos. Environ.*, 10.1016/j.atmosenv.2022.119082, 2022.
